# Supplementary material for: Prediction of an Al4C4 superatom organic framework (SOF) material based on the superatom network model
Source: Royal Society of Chemistry journal article supplement (doi:10.1039/d1cp02798k), 2021-01-01
Supplement: d1cp02798k2.pdf [file d1cp02798k2.pdf]

## Supporting Information

### **Prediction of $\text{Al}_4\text{C}_4$ superatom organic framework (SOF) material based on superatom network model**

By

Jiuqi Yi<sup>1</sup>, Bingbing Gong<sup>2</sup>, Chang Xu<sup>1\*</sup>, Wenhua Zhang<sup>2\*</sup>, and Longjiu Cheng<sup>1,3\*</sup>

<sup>1</sup> *Department of Chemistry, Anhui University, Hefei, 230601, PR China*

<sup>2</sup> *Key Laboratory of Materials for Energy Conversion, CAS, University of Science and Technology of China, Hefei, Anhui 230026, China.*

<sup>3</sup> *Key Laboratory of Structure and Functional Regulation of Hybrid Materials (Anhui University), Ministry of Education, Hefei, 230601, PR China*

\*Corresponding authors email: [clj@ustc.edu](mailto:clj@ustc.edu)(L.C); [whhzhang@ustc.edu.cn](mailto:whhzhang@ustc.edu.cn)(W.Z); [xuchang1986@ahu.edu.cn](mailto:xuchang1986@ahu.edu.cn)(C.X)

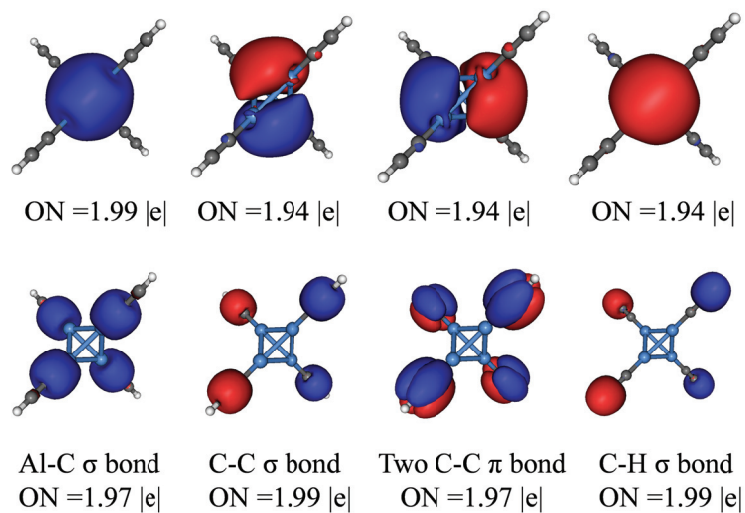

**Fig. S1.** Full AdNDP localized natural bonding orbitals of the  $\text{Al}_4(\text{C}\equiv\text{CH})_4$  cluster. Al, blue; C, grey; and H, white.

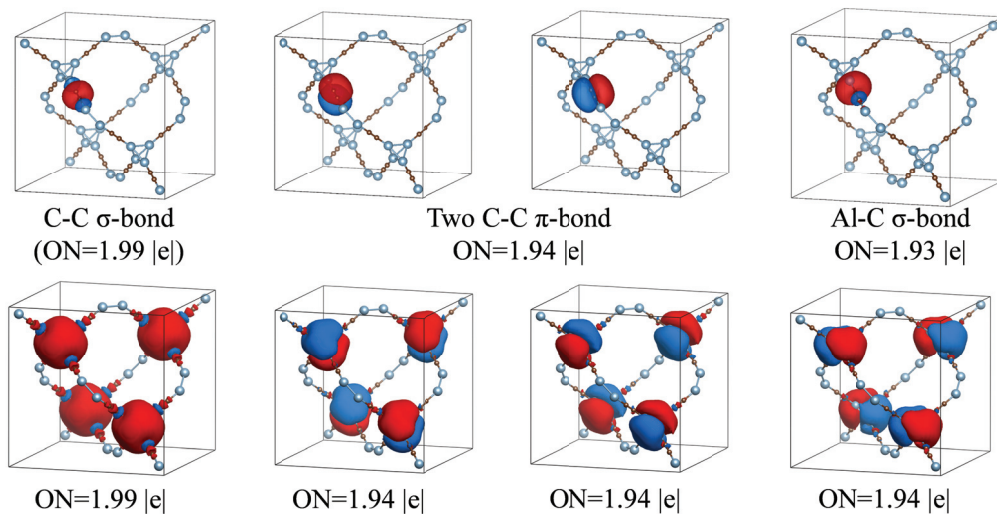

**Fig. S2.** Full SSAdNDP chemical bonding pattern of the  $\text{Al}_4\text{C}_4$  crystal. Al, blue; and C, grey.

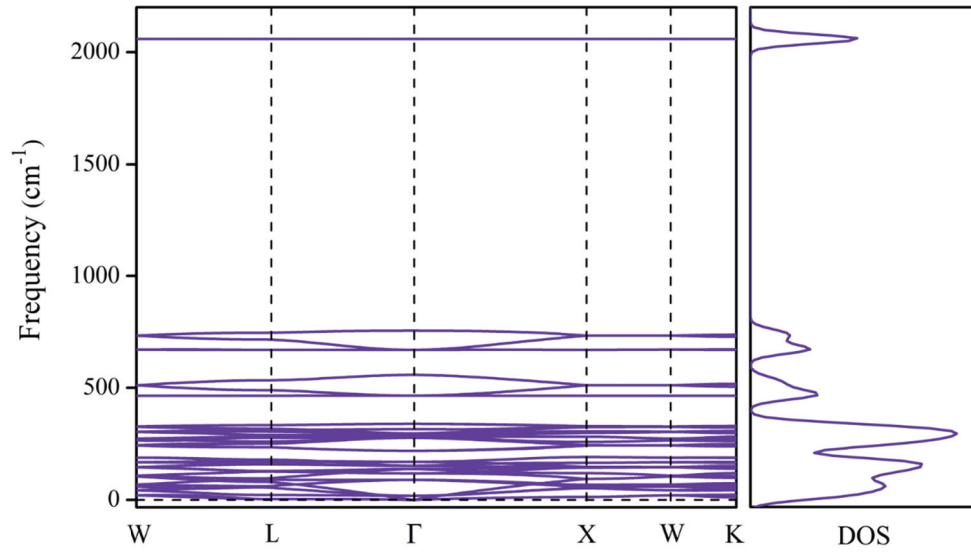

**Fig. S3.** Calculated phonon dispersion curves and phonon density of states for  $\text{Al}_4\text{C}_4$  crystal.

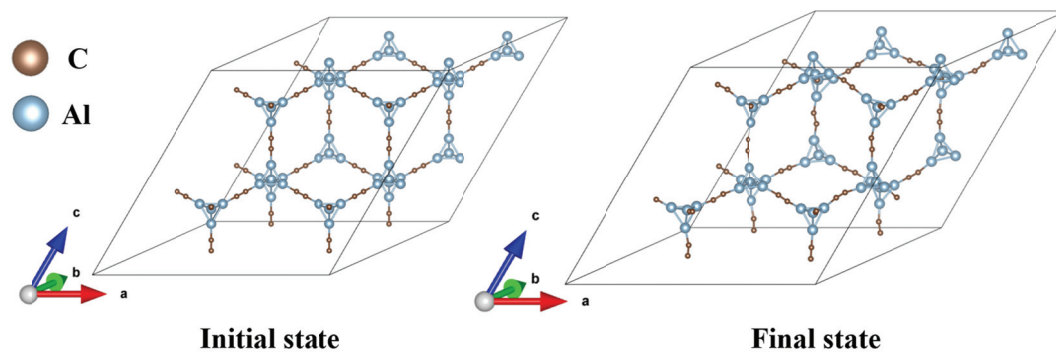

**Fig. S4.** The snapshot of the  $\text{Al}_4\text{C}_4$  supercell before and after the AIMD simulation at 700 K.

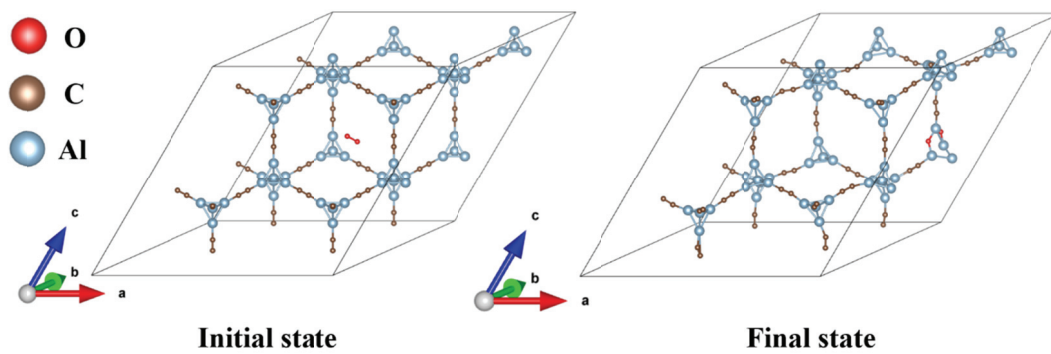

**Fig. S5.** The snapshot of the  $\text{Al}_4\text{C}_4$  supercell with one  $\text{O}_2$  molecule before and after the AIMD simulation at 300 K.

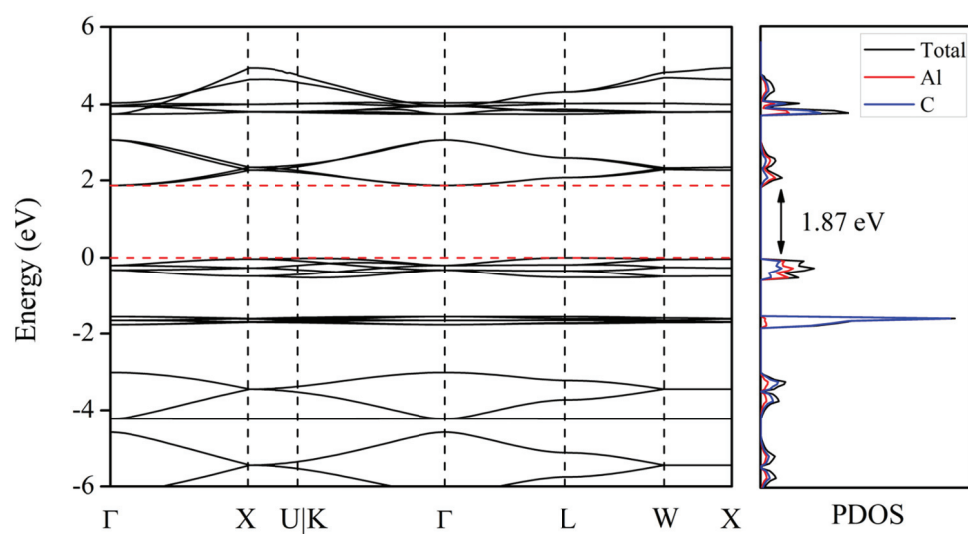

**Fig. S6.** Electronic band structure and projected density of states of the  $\text{Al}_4\text{C}_4$  crystal at the PBE level. The Fermi level is set at zero.

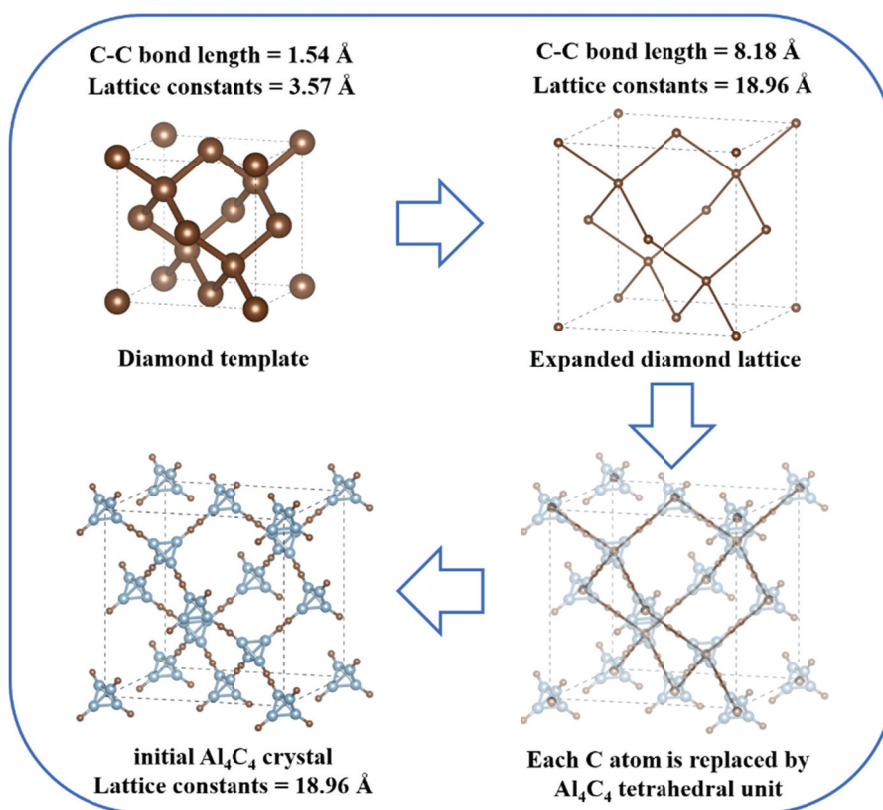

**Fig. S7.** Schematic diagram of the procedure used to generate the initial  $\text{Al}_4\text{C}_4$  crystal structure.



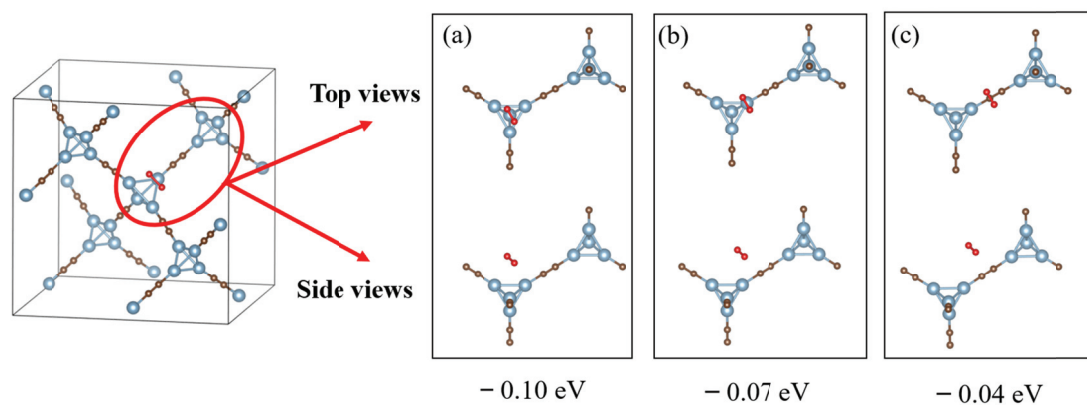

**Fig. S8.** Top and side views of local geometries for  $O_2$  on different adsorption sites of  $Al_4C_4$  (a)-(c). The binding energy of physisorbed  $O_2$  on  $Al_4C_4$  are labeled below. Al, blue; C, brown; and O, red.

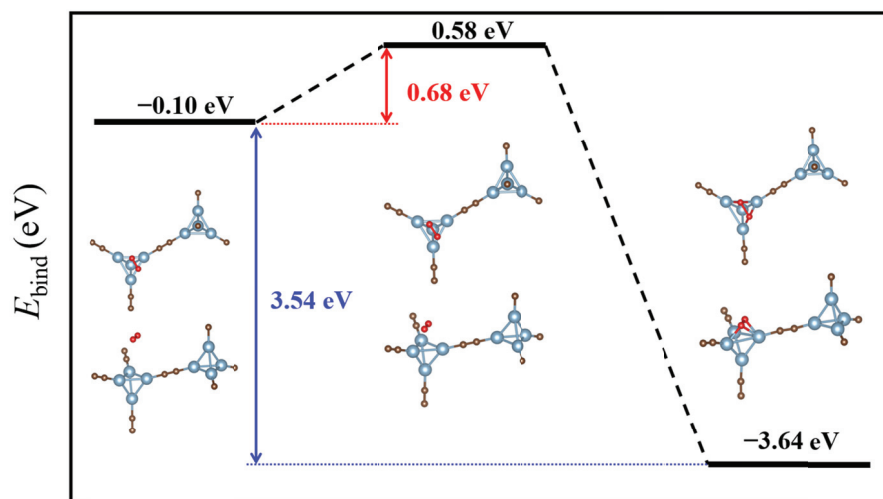

Reaction pathway

**Fig. S9.** The reaction pathway for an  $\text{O}_2$  molecule from physisorption to chemisorption on  $\text{Al}_4\text{C}_4$ . Top and side views of local geometries for three different states are shown. The black line segments indicate the energy levels of the initial, transition, and final states, respectively. The binding energies ( $E_{\text{bind}}$ ) of these states (in black), the heat of reaction (in blue), and the activation energy ( $E_a$ , in red) are labeled. Al, blue; C, brown; and O, red.

**Table S1** The xyz coordinates (in Å) of Al<sub>4</sub>(C≡CH)<sub>4</sub> cluster optimized at PBE/def2tzvp level.

|    |           |           |           |
|----|-----------|-----------|-----------|
| Al | 0.917811  | 0.917811  | 0.917811  |
| Al | -0.917811 | -0.917811 | 0.917811  |
| Al | 0.917811  | -0.917811 | -0.917811 |
| Al | -0.917811 | 0.917811  | -0.917811 |
| C  | -2.024570 | 2.024570  | -2.024570 |
| C  | 2.024570  | 2.024570  | 2.024570  |
| C  | -2.024570 | -2.024570 | 2.024570  |
| C  | 2.024570  | -2.024570 | -2.024570 |
| C  | 2.730842  | -2.730842 | -2.730842 |
| C  | -2.730842 | -2.730842 | 2.730842  |
| C  | -2.730842 | 2.730842  | -2.730842 |
| C  | 2.730842  | 2.730842  | 2.730842  |
| H  | 3.350344  | 3.350344  | 3.350344  |
| H  | -3.350344 | 3.350344  | -3.350344 |
| H  | 3.350344  | -3.350344 | -3.350344 |
| H  | -3.350344 | -3.350344 | 3.350344  |

**Table S2.** Single point energies of the initial state (IS), transition state (TS), and final state (FS) structures of the absorption of O<sub>2</sub> molecule on Al<sub>4</sub>C<sub>4</sub> (Fig. S9) with specified singlet and triplet multiplicities and spin polarization.

| Spin multiplicities | IS                                        | TS                                        | FS                                        |
|---------------------|-------------------------------------------|-------------------------------------------|-------------------------------------------|
| Singlet             | -364.59382968 eV<br>(+0.39)               | -364.49889990 eV<br>(+0.42)               | <b>-369.08675670 eV</b><br><b>(+0.00)</b> |
| Triplet             | <b>-364.98934649 eV</b><br><b>(+0.00)</b> | <b>-364.92125043 eV</b><br><b>(+0.00)</b> | -367.63211523 eV<br>(+0.55)               |
| Spin polarization   | <b>-364.98934649 eV</b>                   | <b>-364.92125043 eV</b>                   | <b>-369.08675670 eV</b>                   |
